# Supplementary material for: Hinge-initiated Primer-dependent Amplification of Nucleic Acids (HIP) – A New Versatile Isothermal Amplification Method
Source: PubMed Central journal article supplement (PMC5550438; doi:10.1038/s41598-017-08067-x), 2017-08-09
Supplement: 41598_2017_8067_MOESM1_ESM.pdf [file 41598_2017_8067_MOESM1_ESM.pdf]

## Supporting Information

# “Hinge-initiated Primer-dependent Amplification of Nucleic Acids (HIP) - A New Versatile Isothermal Amplification Method“

Jens Fischbach, Marcus Frohme, Jörn Glökler

### 1. Results

Table S1 includes the  $T_p$  values (time-to-positivity) for the heatmaps. The dataset includes all combinations of the hinge primers (dSpacer, HEG or without modification) with the corresponding reverse primer as either standard PCR primer (F3 and B3) or the loop-forming primer (FIP and BIP) from LAMP. Additional parameters such as  $R^2$  and the signal increase at the time point  $T_p$  are used to evaluate the calculated  $T_p$  value. Low values indicate no signal increase during amplification or poor quality of the value. The heatmaps in the article (Fig. 3 a-c) represented the HIP reaction with PSTVd-cDNA as template. The negative controls are not included in the heatmap. If samples are determined as false-positive, the corresponding combination is marked with an asterix (\*).

#### **Table S1: Analysis of the different primer combinations including dSpacer, HEG or no modification.**

The  $T_p$  values of the positive reactions are used to generate the heatmaps.  $R^2$  describes the quality of the linear fit around the  $T_p$  value. The maximal signal increase in the  $T_p$  indicates the efficiency of the amplification. HF: Hinge forward primer, HR: hinge reverse primer, ab: dSpacer modification, HEG: C12 modification, um: no modification

| Oligonucleotide                 | Parameter for $T_p$ calculation |              |                                             |
|---------------------------------|---------------------------------|--------------|---------------------------------------------|
|                                 | $R^2$                           | $T_p$ [Min.] | signal increase in $T_p$ (dFU/dt) [FU/Min.] |
| <b>dSpacer primer</b>           |                                 |              |                                             |
| PSTVd-ab-HF + B3 pos            | 1.000                           | 27.25        | 4.83                                        |
| PSTVd-ab-HF + B3 neg            | 0.999                           | -4.53        | 0.32                                        |
| F3 + PSTVd-ab-HR pos            | 0.998                           | 46.54        | 1.77                                        |
| F3 + PSTVd-ab-HR neg            | 0.912                           | 8.32         | 0.15                                        |
| PSTVd-ab-HF + PSTVd-ab-HR pos   | 0.999                           | 26.89        | 2.56                                        |
| PSTVd-ab-HF + PSTVd-ab-HR neg   | 0.998                           | 0.39         | 0.43                                        |
| FIP + PSTVd-ab-HR pos           | 0.997                           | 38.02        | 2.05                                        |
| FIP + PSTVd-ab-HR neg           | 0.970                           | -6.30        | 0.25                                        |
| PSTVd-ab-HF + BIP pos           | 0.999                           | 17.78        | 3.51                                        |
| PSTVd-ab-HF + BIP neg*          | 1.000                           | 43.03        | 3.21                                        |
| <b>Hexaethylenglycol primer</b> |                                 |              |                                             |
| PSTVd-HEG-HF + B3 pos           | 0.999                           | 25.25        | 4.81                                        |
| PSTVd-HEG-HF + B3 neg           | 0.428                           | 2.34         | 0.05                                        |

|                                 |       |        |      |
|---------------------------------|-------|--------|------|
| F3 + PSTVd-HEG-HR pos           | 1.000 | 52.27  | 1.43 |
| F3 + PSTVd-HEG-HR neg*          | 1.000 | 49.22  | 4.44 |
| PSTVd-HEG-HF + PSTVd-HEG-HR pos | 0.999 | 45.68  | 3.06 |
| PSTVd-HEG-HF + PSTVd-HEG-HR neg | 0.938 | -6.75  | 0.22 |
| FIP + PSTVd-HEG-HR pos          | 1.000 | 45.67  | 3.04 |
| FIP + PSTVd-HEG-HR neg*         | 1.000 | 47.18  | 0.3  |
| PSTVd-HEG-HF + BIP pos          | 0.999 | 47.54  | 2.53 |
| PSTVd-HEG-HF + BIP neg*         | 1.000 | 53.10  | 3.53 |
| <b>Unmodified primer</b>        |       |        |      |
| PSTVd-um-HF + B3 pos            | 0.961 | 0.65   | 0.31 |
| PSTVd-um-HF + B3 neg            | 0.952 | -5.04  | 0.18 |
| F3 + PSTVd-um-HR pos            | 1.000 | 48.56  | 4.59 |
| F3 + PSTVd-um-HR neg            | 0.962 | -2.15  | 0.53 |
| PSTVd-um-HF + PSTVd-um-HR pos   | 0.997 | 44.57  | 4.68 |
| PSTVd-um-HF + PSTVd-um-HR neg*  | 1.000 | 49.92  | 4.87 |
| PSTVd-um-HF + BIP pos           | 0.996 | 42.06  | 7.36 |
| PSTVd-um-HF + BIP neg           | 0.980 | -2.76  | 0.34 |
| FIP + PSTVd-um-HR pos           | 0.984 | 0.80   | 2.31 |
| FIP + PSTVd-um-HR neg*          | 1.000 | 49.98  | 5.62 |
| <b>LAMP primer</b>              |       |        |      |
| FIP + B3 pos                    | 1.000 | 43.07  | 3.38 |
| FIP + B3 neg                    | 0.978 | -8.44  | 0.14 |
| F3 + BIP pos                    | 1.000 | 52.99  | 2.95 |
| F3 + BIP neg                    | 1.000 | -4.75  | 0.17 |
| FIP + BIP pos                   | 1.000 | 46.31  | 2.88 |
| FIP + BIP neg                   | 1.000 | -4.84  | 0.17 |
| F3 + B3 pos                     | 1.000 | -10.38 | 0.12 |
| F3 + B3 neg                     | 0.246 | -21.27 | 0.04 |
